# Supplementary material
Source: publisher site journal article supplement (https://static.cambridge.org/content/id/urn:cambridge.org:id:article:S0033822219000341/resource/name/S0033822219000341supp001.xlsx)
Supplement: Supplementary file 1 [file S0033822219000341supp001.xlsx]

## Sheet: Sheet1
tree/ring	sample id	cal BP	C14 age (yr BP)	C14 age error (yr)	Delta14C (per mil)
Kom121375b, ring 2	MAMS-37553	1660	1801.21	20.3298	-23.2734
Kom121375b, ring 3	MAMS-37554	1659	1789.94	20.7157	-21.8819
Kom121375b, ring 4	MAMS-37555	1658	1767.15	21.6678	-16.7147
Kom121375b, ring 5	MAMS-37556	1657	1764.05	20.5991	-19.0027
Kom121375b, ring 6	MAMS-37557	1656	1765.06	20.5102	-20.7541
Kom121375b, ring 7	MAMS-37558	1655	1787.5	20.6586	-22.242
Kom121375b, ring 8	MAMS-37559	1654	1786.19	20.5867	-22.0911
Kom121375b, ring 9	MAMS-37560	1653	1775.9	20.5495	-20.9452
Kom121375b, ring 10	MAMS-37561	1652	1786.47	24.4585	-19.7735
Kom121375b, ring 11	MAMS-37562	1651	1758.18	21.4384	-16.9401
Kom121375b, ring 12	MAMS-37563	1650	1790.34	17.4144	-23.0173
Kom121375b, ring 13	MAMS-37564	1649	1804.15	17.483	-24.8135
Kom121375b, ring 14	MAMS-37565	1648	1798.43	18.0303	-24.2364
Kom121375b, ring 15	MAMS-37566	1647	1797.54	17.846	-24.2474
Kom121375b, ring 16	MAMS-37567	1646	1779.68	17.4578	-22.1933
Kom121375b, ring 17	MAMS-37568	1645	1786.42	17.6015	-23.1316
Kom121375b, ring 18	MAMS-37569	1644	1777.66	17.6055	-22.1835
Kom121375b, ring 21	MAMS-37572	1641	1769.9	17.3981	-21.5946
Kom121375b, ring 22	MAMS-37573	1640	1753.05	19.2339	-19.6578
Kom121375b, ring 23	MAMS-37574	1639	1781.47	18.3125	-23.2387
Kom121375b, ring 24	MAMS-37575	1638	1782.42	17.5905	-23.4718
Kom121375b, ring 25	MAMS-37576	1637	1786	17.5986	-24.0257
Kom121375b, ring 26	MAMS-37577	1636	1783.13	18.7205	-21.2964
Kom121375b, ring 27	MAMS-37578	1635	1775.19	17.5118	-21.5825
Kom121375b, ring 28	MAMS-37579	1634	1783.16	17.5149	-24.0343
Kom121375b, ring 29	MAMS-37580	1633	1785.68	17.5698	-24.4589
Kom121375b, ring 30	MAMS-37581	1632	1745.99	17.6032	-19.7451
Kom121375b, ring 31	MAMS-37582	1631	1742.1	17.4722	-19.3885
Kom121375b, ring 32	MAMS-37583	1630	1755.94	17.0941	-21.1961
Kom121375b, ring 33	MAMS-37584	1629	1771.36	17.3106	-23.1912
Kom121375b, ring 34	MAMS-37585	1628	1781.92	17.0785	-24.5925
Kom121375b, ring 35	MAMS-37586	1627	1780.19	17.0384	-24.5
Kom121375b, ring 36	MAMS-37587	1626	1793.46	17.2514	-26.2274
Kom121375b, ring 37	MAMS-37588	1625	1772.09	17.5403	-23.7524
Kom121375b, ring 38	MAMS-37589	1624	1762.08	17.3674	-22.6531
Kom121375b, ring 39	MAMS-37590	1623	1706.98	17.5745	-16.0445
Kom121375b, ring 41	MAMS-37592	1621	1744.37	18.3375	-20.8509
Kom121375b, ring 42	MAMS-37593	1620	1691.75	20.3426	-14.5358
Kom121375b, ring 44	MAMS-37595	1618	1725.14	17.4562	-18.8611
Kom121375b, ring 45	MAMS-37596	1617	1765.75	17.2404	-23.9258
Kom121375b, ring 46	MAMS-37597	1616	1752.69	17.3324	-22.4567
Kom121375b, ring 47	MAMS-37598	1615	1747.86	17.0829	-21.9866
Kom121375b, ring 49	MAMS-37600	1613	1767.86	17.2799	-24.6542
Kom121375b, ring 50	MAMS-37601	1612	1743.16	17.1286	-21.7696
Kom121375b, ring 51	MAMS-37602	1611	1708.32	18.1223	-17.636
Kom121375b, ring 52	MAMS-37603	1610	1704.21	21.1305	-17.2524
Kom121375b, ring 53	MAMS-37604	1609	1753.45	17.5366	-23.3765
Kom121375b, ring 54	MAMS-37605	1608	1688.71	18.0392	-15.5918
Kom121375b, ring 55	MAMS-37606	1607	1738.36	17.1061	-21.7759
Kom121375b, ring 56	MAMS-37607	1606	1767.97	18.4337	-25.4939
Kom121375b, ring 57	MAMS-37608	1605	1747.77	19.4997	-23.1581
Kom121375b, ring 58	MAMS-37609	1604	1761.87	16.8464	-24.9886
Kom121375b, ring 59	MAMS-37610	1603	1723.44	17.7858	-20.4315
Kom121375b, ring 62	MAMS-25328	1600	1725.47	18.9717	-21.04
Kom121375b, ring 63	MAMS-25329	1599	1696.65	20.2811	-17.63
Kom121375b, ring 64	MAMS-25330	1598	1716.34	18.517	-20.16
Kom121375b, ring 65	MAMS-25331	1597	1688	19.3899	-16.78
Kom121375b, ring 66	MAMS-25332	1596	1693.74	18.4814	-17.64
Kom121375b, ring 67	MAMS-25333	1595	1714.89	18.273	-20.34
Kom121375b, ring 68	MAMS-25334	1594	1737.56	18.7533	-23.22
Kom121375b, ring 69	MAMS-25335	1593	1690.35	18.3474	-17.58
Kom121375b, ring 70	MAMS-25336	1592	1729.1	18.4767	-22.42
Kom121375b, ring 71	MAMS-25337	1591	1746	19.3973	-24.53
Kom121375b, ring 72	MAMS-25338	1590	1734.12	19.4822	-23.27
Kom121375b, ring 73	MAMS-25339	1589	1726.78	19.2466	-22.5
Kom121375b, ring 74	MAMS-25340	1588	1674.73	19.5083	-16.26
Kom121375b, ring 75	MAMS-25341	1587	1704.02	19.5512	-19.96
Kom121375b, ring 76	MAMS-25342	1586	1708.16	19.4338	-20.58
Kom121375b, ring 77	MAMS-25343	1585	1684	19.6504	-17.73
Kom121375b, ring 78	MAMS-25344	1584	1684.23	19.3026	-17.9
Kom121375b, ring 79	MAMS-25345	1583	1704.57	19.6317	-20.5
Kom121375b, ring 80	MAMS-25346	1582	1691.38	19.3793	-19.01
Kom121375b, ring 81	MAMS-25347	1581	1701.33	19.0863	-20.34
Kom121375b, ring 82	MAMS-25348	1580	1713.49	19.4113	-21.94
Kom121375b, ring 83	MAMS-25349	1579	1734.32	19.4618	-24.59
Kom121375b, ring 84	MAMS-25350	1578	1699.56	19.4799	-20.48
Kom121375b, ring 85	MAMS-25351	1577	1718.37	19.3818	-22.89
Kom121375b, ring 86	MAMS-25352	1576	1652	20.5124	-14.86
Kom121375b, ring 87	MAMS-25353	1575	1693.87	19.1593	-20.14
Kom121375b, ring 88	MAMS-25354	1574	1697.59	19.2873	-20.72
Kom121375b, ring 89	MAMS-25355	1573	1719.91	19.4484	-23.55
Kom121375b, ring 90	MAMS-25356	1572	1716.27	19.2407	-23.23
Kom121375b, ring 91	MAMS-25357	1571	1701.3	19.4933	-21.52
Kom121375b, ring 92	MAMS-25358	1570	1705.25	19.2912	-22.12
Kom121375b, ring 93	MAMS-25359	1569	1702.48	19.5749	-21.9
Kom121375b, ring 94	MAMS-25360	1568	1677.17	19.4457	-18.94
Kom121375b, ring 95	MAMS-15779	1567	1682.89	19.5859	-19.75
Kom121375b, ring 96	MAMS-15780	1566	1702.43	19.3134	-22.25
Kom121375b, ring 97	MAMS-15781	1565	1678.03	19.489	-19.4
Kom121375b, ring 98	MAMS-15782	1564	1672.24	19.3229	-18.81
Kom121375b, ring 99	MAMS-15783	1563	1708.38	19.2641	-23.33
Kom121375b, ring 100	MAMS-15784	1562	1702.71	19.4968	-22.76
Kom121375b, ring 101	MAMS-15785	1561	1690.96	19.5526	-21.45
Kom121375b, ring 102	MAMS-15786	1560	1704.15	19.505	-23.17
Kom121375b, ring 103	MAMS-15787	1559	1721.19	19.4423	-25.36
Kom121375b, ring 104	MAMS-15788	1558	1694.45	19.8149	-22.23
Kom121375b, ring 105	MAMS-15789	1557	1729.81	19.4893	-26.64
Kom121375b, ring 106	MAMS-15790	1556	1708.45	19.6554	-24.17
Kom121375b, ring 107	MAMS-15791	1555	1680.23	19.3107	-20.85
Kom121375b, ring 108	MAMS-15792	1554	1697.44	19.4942	-23.06
Kom121375b, ring 109	MAMS-15793	1553	1681.69	19.533	-21.27
Kom121375b, ring 110	MAMS-15794	1552	1729.97	19.2265	-27.25
Kom121375b, ring 111	MAMS-15795	1551	1685.52	19.621	-21.97
Kom121375b, ring 112	MAMS-15796	1550	1719.09	17.4269	-26.16
Kom121375b, ring 113	MAMS-15797	1549	1709.67	17.9849	-25.14
Kom121375b, ring 114	MAMS-15798	1548	1721.28	16.5922	-26.67
Kom121375b, ring 115	MAMS-15799	1547	1692.13	17.883	-23.25
Kom121375b, ring 116	MAMS-15800	1546	1676.65	18.1099	-21.48
Kom121375b, ring 117	MAMS-15801	1545	1692.95	17.1221	-23.58
Kom121375b, ring 118	MAMS-15802	1544	1652.84	17.6577	-18.81
Kom121375b, ring 119	MAMS-15803	1543	1701.3	17.1833	-24.83
Kom121375b, ring 120	MAMS-15804	1542	1689.29	16.7935	-23.49
Kom121375b, ring 121	MAMS-15805	1541	1643.41	16.5368	-18.02
Kom121375b, ring 122	MAMS-15806	1540	1659.18	16.6882	-20.06
Kom121375b, ring 123	MAMS-15807	1539	1648.04	21.0776	-18.82
Kom121375b, ring 124	MAMS-15808	1538	1664.04	21.0659	-20.89
Kom121375b, ring 125	MAMS-15809	1537	1704.34	19.1236	-25.91
Kom121375b, ring 126	MAMS-15810	1536	1657.07	20.7522	-20.28
Kom121375b, ring 127	MAMS-24194	1535	1642.1	17.2411	-18.57
Kom121375b, ring 128	MAMS-24195	1534	1653	17.9904	-19.96
Kom121375b, ring 129	MAMS-24196	1533	1625.51	18.1328	-16.78
Kom121375b, ring 130	MAMS-24197	1532	1644.07	17.5585	-19.17
Kom121375b, ring 131	MAMS-24198	1531	1601.06	17.7744	-14.02
Kom121375b, ring 132	MAMS-24199	1530	1611.89	17.6855	-15.47
Kom121375b, ring 133	MAMS-24200	1529	1619.76	17.7581	-16.55
Kom121375b, ring 134	MAMS-24201	1528	1640.29	17.7819	-19.18
Kom121375b, ring 135	MAMS-24202	1527	1614.75	17.9624	-16.17
Kom121375b, ring 136	MAMS-24203	1526	1600.53	17.9189	-14.55
Kom121375b, ring 137	MAMS-24204	1525	1613.96	17.7352	-16.32
Kom121375b, ring 138	MAMS-24205	1524	1628.34	17.6422	-18.19
Kom121375b, ring 139	MAMS-24206	1523	1597.82	18.3014	-14.58
Kom121375b, ring 140	MAMS-24207	1522	1593.17	17.7998	-14.12
Kom121375b, ring 141	MAMS-24208	1521	1621.2	17.7639	-17.68
Kom121375b, ring 142	MAMS-24209	1520	1639.63	18.1371	-20.05
Kom121375b, ring 143	MAMS-25364	1519	1589.02	18.2211	-13.97
Kom121375b, ring 144	MAMS-25365	1518	1620.12	18.7755	-17.9
Kom121375b, ring 145	MAMS-25366	1517	1597.52	18.3225	-15.25
Kom121375b, ring 146	MAMS-25367	1516	1627.75	17.765	-19.07
Kom121375b, ring 147	MAMS-25368	1515	1609.67	17.7137	-16.98
Kom121375a, ring 148	MAMS-25369	1514	1555.66	18.0525	-10.47
Kom121375a, ring 149	MAMS-25370	1513	1597.28	18.561	-15.7
Kom121375a, ring 150	MAMS-25371	1512	1565.47	18.586	-11.91
Kom121375a, ring 151	MAMS-25372	1511	1551.67	19.539	-10.34
Kom121375a, ring 152	MAMS-25373	1510	1594.06	18.669	-15.66
Kom121375a, ring 153	MAMS-25374	1509	1618.67	18.2926	-18.79
Kom121375a, ring 154	MAMS-25375	1508	1609.9	18.837	-17.84
Kom121375a, ring 155	MAMS-25376	1507	1573.64	19.7973	-13.52
Kom121375a, ring 156	MAMS-25377	1506	1569.02	18.8141	-13.07
Kom121375a, ring 157	MAMS-25378	1505	1561.05	19.4913	-12.21
Kom121375a, ring 158	MAMS-25379	1504	1568.65	19.0803	-13.26
Kom121375a, ring 159	MAMS-25380	1503	1567.03	19.7585	-13.18
Kom121375a, ring 160	MAMS-25381	1502	1564.6	19.5595	-13
Kom121375a, ring 161	MAMS-25382	1501	1573.18	19.5177	-14.18
Kom121375a, ring 162	MAMS-25383	1500	1570.21	19.681	-13.93
Kom121375a, ring 163	MAMS-25384	1499	1568.45	20.2392	-13.83
Kom121375a, ring 164	MAMS-25385	1498	1635.59	19.464	-22.16
Kom121375a, ring 165	MAMS-25386	1497	1553.37	18.5892	-12.22
Kom121375a, ring 166	MAMS-25387	1496	1578.56	20.315	-15.43
Kom121375a, ring 167	MAMS-25388	1495	1572.13	19.7901	-14.76
Kom121375a, ring 168	MAMS-25389	1494	1570.4	19.6154	-14.67
Kom121375a, ring 169	MAMS-25390	1493	1552.19	19.6916	-12.55
Kom121375a, ring 170	MAMS-25391	1492	1604	20.6495	-19.02
Kom121375a, ring 171	MAMS-25392	1491	1569.8	20.8311	-14.95
Kom121375a, ring 172	MAMS-25393	1490	1561.92	20.5328	-14.11
Publik2918, ring 1	MAMS-31618	1568	1681.94	17.1395	-19.52
Publik2918, ring 2	MAMS-31619	1567	1669.89	16.8731	-18.17
Publik2918, ring 3	MAMS-31620	1566	1702.04	16.9586	-22.2
Publik2918, ring 5	MAMS-31622	1564	1694.65	17.1507	-21.54
Publik2918, ring 6	MAMS-31623	1563	1710.4	16.7909	-23.58
Publik2918, ring 7	MAMS-31624	1562	1695.82	17.1249	-21.92
Publik2918, ring 8	MAMS-31625	1561	1706.29	16.8105	-23.31
Publik2918, ring 9	MAMS-31626	1560	1730.43	16.6267	-26.36
Publik2918, ring 10	MAMS-31627	1559	1677.52	16.5278	-20.05
Publik2918, ring 11	MAMS-31628	1558	1670.66	16.6221	-19.33
Publik2918, ring 12	MAMS-31629	1557	1688.52	16.6039	-21.62
Publik2918, ring 15	MAMS-31632	1554	1668.66	17.0147	-19.56
Publik2918, ring 16	MAMS-31633	1553	1687.9	16.8016	-22.02
Publik2918, ring 17	MAMS-31634	1552	1716.1	16.2469	-25.57
Publik2918, ring 18	MAMS-31635	1551	1694.57	16.7375	-23.07
Publik2918, ring 19	MAMS-31636	1550	1677.26	16.8313	-21.08
Publik2918, ring 20	MAMS-31637	1549	1697.85	16.5806	-23.7
Publik2918, ring 21	MAMS-31638	1548	1693.16	16.8533	-23.25
Publik2918, ring 22	MAMS-31639	1547	1701.69	16.9818	-24.41
Publik2918, ring 23	MAMS-31640	1546	1667.95	16.7511	-20.42
Publik2918, ring 24	MAMS-31641	1545	1695.05	16.7378	-23.84
Publik2918, ring 25	MAMS-31642	1544	1657	16.7073	-19.32
Publik2918, ring 26	MAMS-31643	1543	1657.53	16.4967	-19.5
Publik2918, ring 27	MAMS-31644	1542	1643.2	17.0296	-17.87
Publik2918, ring 28	MAMS-31645	1541	1673.66	17.0662	-21.71
Publik2918, ring 29	MAMS-31646	1540	1657.94	16.9396	-19.91
Publik2918, ring 30	MAMS-31647	1539	1679.46	18.2296	-22.65
Publik2918, ring 31	MAMS-31648	1538	1661.15	18.1445	-20.54
Publik2918, ring 32	MAMS-31649	1537	1679.01	17.8498	-22.83
Publik2918, ring 33	MAMS-31650	1536	1638.03	18.6332	-17.95
Publik2918, ring 34	MAMS-31651	1535	1653.53	17.8239	-19.96
Publik2918, ring 35	MAMS-31652	1534	1649.43	17.7024	-19.58
Publik2918, ring 36	MAMS-31653	1533	1650.82	19.0827	-19.87
Publik2918, ring 37	MAMS-31654	1532	1630.6	17.8165	-17.52
Publik2918, ring 38	MAMS-31655	1531	1604.57	18.9677	-14.45
Publik2918, ring 39	MAMS-31656	1530	1611.44	17.8393	-15.41
Publik2918, ring 40	MAMS-31657	1529	1633.94	17.7968	-18.28
Publik2918, ring 41	MAMS-31658	1528	1657.87	17.5129	-21.32
Publik2918, ring 42	MAMS-31659	1527	1609.69	18.0629	-15.55
Publik2918, ring 43	MAMS-31660	1526	1607.32	18.1983	-15.38
Publik2918, ring 44	MAMS-31661	1525	1634.97	17.6542	-18.88
Publik2918, ring 45	MAMS-31662	1524	1625.56	18.3253	-17.85
Publik2918, ring 46	MAMS-31663	1523	1621.99	18.1879	-17.54
Publik2918, ring 47	MAMS-31664	1522	1615.1	19.5012	-16.81
Publik2918, ring 48	MAMS-31665	1521	1581.18	17.6889	-12.77
Publik2918, ring 49	MAMS-31666	1520	1606.38	17.7699	-15.98
Publik2918, ring 50	MAMS-31667	1519	1606.64	17.2967	-16.13
Publik2918, ring 51	MAMS-31668	1518	1603.64	17.2642	-15.88
Publik2918, ring 52	MAMS-31669	1517	1621.26	17.9889	-18.16
Publik2918, ring 53	MAMS-31670	1516	1591.14	17.8854	-14.59
Publik2918, ring 54	MAMS-31671	1515	1583	18.206	-13.71
Publik2918, ring 55	MAMS-31672	1514	1588.75	18.1883	-14.53
Publik2918, ring 56	MAMS-31673	1513	1605.22	18.3457	-16.67
Publik2918, ring 57	MAMS-31674	1512	1608.34	17.7447	-17.17
Publik2918, ring 58	MAMS-31675	1511	1577.28	18.2352	-13.49
Publik2918, ring 59	MAMS-31676	1510	1584.67	17.5852	-14.51
Publik2918, ring 60	MAMS-31677	1509	1577.04	14.9323	-13.69
Publik2918, ring 61	MAMS-31678	1508	1579.22	14.7648	-14.08
Publik2918, ring 63	MAMS-31680	1506	1563.68	14.9775	-12.41
Publik2918, ring 64	MAMS-31681	1505	1583.5	15.0644	-14.96
Publik2918, ring 65	MAMS-31682	1504	1550.77	14.8922	-11.06
Publik2918, ring 66	MAMS-31683	1503	1573.25	14.8189	-13.94
Publik2918, ring 67	MAMS-31684	1502	1588.46	15.0042	-15.93
Publik2918, ring 68	MAMS-31685	1501	1606.41	15.6042	-18.24
Publik2918, ring 69	MAMS-31686	1500	1604.28	14.8854	-18.1
Publik2918, ring 70	MAMS-31687	1499	1575.64	15.2257	-14.71
Publik2918, ring 71	MAMS-31688	1498	1597.91	15.2523	-17.56
Publik2918, ring 72	MAMS-31689	1497	1583.46	14.9885	-15.91
Publik2918, ring 73	MAMS-31690	1496	1585.01	14.9175	-16.22
Publik2918, ring 74	MAMS-31691	1495	1609.48	14.6017	-19.33
Publik2918, ring 75	MAMS-31692	1494	1596.9	15.032	-17.91
Publik2918, ring 76	MAMS-31693	1493	1570.65	15.2901	-14.82
Publik2918, ring 77	MAMS-31694	1492	1575.09	15.0794	-15.48
Publik2918, ring 78	MAMS-31695	1491	1581.01	14.9696	-16.33
Publik2918, ring 79	MAMS-31696	1490	1579.07	15.733	-16.21
Publik2918, ring 80	MAMS-31697	1489	1592.16	15.2498	-17.93
Publik2918, ring 81	MAMS-31698	1488	1599.53	15.3878	-18.95
Publik2918, ring 82	MAMS-31699	1487	1611.04	15.4013	-20.47
Publik2918, ring 83	MAMS-31700	1486	1598.99	14.9803	-19.12
Publik2918, ring 84	MAMS-31701	1485	1569.7	15.3326	-15.65
Publik2918, ring 85	MAMS-31702	1484	1595.76	15.5378	-18.96
Publik2918, ring 86	MAMS-31703	1483	1574.09	15.1191	-16.43
Publik2918, ring 87	MAMS-31704	1482	1584.95	15.2111	-17.88
Publik2918, ring 88	MAMS-31705	1481	1582.06	15.7917	-17.64
Publik2918, ring 89	MAMS-31706	1480	1595.11	12.8361	-19.36
Publik2918, ring 90	MAMS-31707	1479	1588.93	12.9585	-18.72
Publik2918, ring 91	MAMS-31708	1478	1602.31	13.6412	-20.47
Publik2918, ring 92	MAMS-31709	1477	1617.11	12.5707	-22.39
Publik2918, ring 93	MAMS-31710	1476	1583.06	13.8947	-18.36
Publik2918, ring 95	MAMS-31712	1474	1597.58	13.0068	-20.37
Publik2918, ring 96	MAMS-31713	1473	1589.09	13.4025	-19.45
Publik2918, ring 97	MAMS-31714	1472	1606.89	12.2374	-21.74
Publik2918, ring 98	MAMS-31715	1471	1582.63	13.7804	-18.9
Publik2918, ring 99	MAMS-31716	1470	1567.89	13.2924	-17.22
Publik2918, ring 100	MAMS-31717	1469	1556.21	13.7874	-15.91
Publik2918, ring 101	MAMS-31718	1468	1569.76	13.027	-17.68
Publik2918, ring 102	MAMS-31719	1467	1574.87	12.6675	-18.43
Publik2918, ring 103	MAMS-31720	1466	1588.62	14.1655	-20.22
Publik2918, ring 104	MAMS-31721	1465	1570.3	12.5543	-18.11
Publik2918, ring 105	MAMS-31722	1464	1567.43	12.0902	-17.87
